# Supplementary material for: Unbinding of fluorinated oxime drug from the AChE gorge in polarizable water: a well-tempered metadynamics study
Source: Royal Society of Chemistry journal article supplement (doi:10.1039/c6cp08518k), 2017-01-01
Supplement: c6cp08518k1.pdf [file c6cp08518k1.pdf]

## Supporting Information

### Unbinding of Fluorinated Oxime Drug from AChE Gorge in Polarizable Water: A Well-Tempered Meta Dynamics Study

Arup Kumar Pathak\* and Tusar Bandyopadhyay

Theoretical Chemistry Section, Chemistry Group, Bhabha Atomic Research Centre, Mumbai-400085, India

\*E Mail address: akpathak@barc.gov.in, Fax: +91-22-2550 5151

#### 1. Generalized AMBER Force field parameters for the drugs

##### (A) OBI

```
[ atom types ]
;name  bond_type  mass  charge  ptype  sigma  epsilon
oh     oh         0.00000  0.00000  A      3.06647e-01  8.80314e-01
ho     ho         0.00000  0.00000  A      0.00000e+00  0.00000e+00
n2     n2         0.00000  0.00000  A      3.25000e-01  7.11280e-01
ce     ce         0.00000  0.00000  A      3.39967e-01  3.59824e-01
ca     ca         0.00000  0.00000  A      3.39967e-01  3.59824e-01
ha     ha         0.00000  0.00000  A      2.59964e-01  6.27600e-02
h4     h4         0.00000  0.00000  A      2.51055e-01  6.27600e-02
na     na         0.00000  0.00000  A      3.25000e-01  7.11280e-01
c3     c3         0.00000  0.00000  A      3.39967e-01  4.57730e-01
os     os         0.00000  0.00000  A      3.00001e-01  7.11280e-01
h2     h2         0.00000  0.00000  A      2.29317e-01  6.56888e-02
```

```
[ atoms ]
;  nr  type  resi  res  atom  cgnr  charge  mass
   1  oh    1    OBI  O3    1     0.1428  16.00000
   2  ho    1    OBI  H32   2     0.3119   1.00800
   3  n2    1    OBI  N4    3    -0.3009  14.01000
   4  ce    1    OBI  C14   4    -0.6436  12.01000
   5  ca    1    OBI  C11   5     0.0293  12.01000
   6  ca    1    OBI  C12   6    -0.1862  12.01000
   7  ha    1    OBI  H12   7     0.2752   1.00800
   8  ca    1    OBI  C13   8    -0.1437  12.01000
   9  h4    1    OBI  H13   9     0.1798   1.00800
  10  ca    1    OBI  C10  10     0.4319  12.01000
  11  ha    1    OBI  H10  11     0.3230   1.00800
  12  ca    1    OBI  C9   12    -0.0549  12.01000
  13  h4    1    OBI  H9   13     0.1784   1.00800
  14  na    1    OBI  N3   14     0.2645  14.01000
  15  c3    1    OBI  C8   15    -0.5683  12.01000
  16  os    1    OBI  O2   16     0.0216  16.00000
  17  c3    1    OBI  C7   17    -0.3621  12.01000
  18  na    1    OBI  N2   18     0.2534  14.01000
  19  ca    1    OBI  C5   19    -0.1499  12.01000
  20  h4    1    OBI  H5   20     0.1866   1.00800
  21  ca    1    OBI  C6   21    -0.3915  12.01000
  22  ha    1    OBI  H6   22     0.2706   1.00800
```

|    |    |   |     |      |    |         |          |
|----|----|---|-----|------|----|---------|----------|
| 23 | ca | 1 | OBI | C4   | 23 | -0.4299 | 12.01000 |
| 24 | h4 | 1 | OBI | H4   | 24 | 0.2213  | 1.00800  |
| 25 | ca | 1 | OBI | C3   | 25 | 0.7984  | 12.01000 |
| 26 | ha | 1 | OBI | H31  | 26 | 0.3204  | 1.00800  |
| 27 | ca | 1 | OBI | C2   | 27 | 0.1513  | 12.01000 |
| 28 | ce | 1 | OBI | C1   | 28 | -0.6434 | 12.01000 |
| 29 | n2 | 1 | OBI | N1   | 29 | -0.3035 | 14.01000 |
| 30 | oh | 1 | OBI | O1   | 30 | 0.1422  | 16.00000 |
| 31 | ho | 1 | OBI | H15  | 31 | 0.3121  | 1.00800  |
| 32 | h4 | 1 | OBI | HC14 | 32 | 0.2288  | 1.00800  |
| 33 | h2 | 1 | OBI | HC82 | 33 | 0.2229  | 1.00800  |
| 34 | h2 | 1 | OBI | HC83 | 34 | 0.2179  | 1.00800  |
| 35 | h2 | 1 | OBI | HC72 | 35 | 0.1931  | 1.00800  |
| 36 | h2 | 1 | OBI | HC73 | 36 | 0.2695  | 1.00800  |
| 37 | h4 | 1 | OBI | HC1  | 37 | 0.2310  | 1.00800  |

[ bonds ]

| ; | ai | aj | funct | r          | k          |              |
|---|----|----|-------|------------|------------|--------------|
|   | 1  | 2  | 1     | 9.7400e-02 | 3.0928e+05 | ; O3 - H32   |
|   | 1  | 3  | 1     | 1.3940e-01 | 3.4828e+05 | ; O3 - N4    |
|   | 3  | 4  | 1     | 1.2790e-01 | 5.0191e+05 | ; N4 - C14   |
|   | 4  | 5  | 1     | 1.4720e-01 | 3.0627e+05 | ; C14 - C11  |
|   | 4  | 32 | 1     | 1.0916e-01 | 2.8267e+05 | ; C14 - HC14 |
|   | 5  | 6  | 1     | 1.3870e-01 | 4.0033e+05 | ; C11 - C12  |
|   | 5  | 10 | 1     | 1.3870e-01 | 4.0033e+05 | ; C11 - C10  |
|   | 6  | 7  | 1     | 1.0870e-01 | 2.8811e+05 | ; C12 - H12  |
|   | 6  | 8  | 1     | 1.3870e-01 | 4.0033e+05 | ; C12 - C13  |
|   | 8  | 9  | 1     | 1.0880e-01 | 2.8694e+05 | ; C13 - H13  |
|   | 8  | 14 | 1     | 1.3500e-01 | 3.9355e+05 | ; C13 - N3   |
|   | 10 | 11 | 1     | 1.0870e-01 | 2.8811e+05 | ; C10 - H10  |
|   | 10 | 12 | 1     | 1.3870e-01 | 4.0033e+05 | ; C10 - C9   |
|   | 12 | 13 | 1     | 1.0880e-01 | 2.8694e+05 | ; C9 - H9    |
|   | 12 | 14 | 1     | 1.3500e-01 | 3.9355e+05 | ; C9 - N3    |
|   | 14 | 15 | 1     | 1.4560e-01 | 2.8008e+05 | ; N3 - C8    |
|   | 15 | 16 | 1     | 1.4390e-01 | 2.5230e+05 | ; C8 - O2    |
|   | 15 | 33 | 1     | 1.1000e-01 | 2.7313e+05 | ; C8 - HC82  |
|   | 15 | 34 | 1     | 1.1000e-01 | 2.7313e+05 | ; C8 - HC83  |
|   | 16 | 17 | 1     | 1.4390e-01 | 2.5230e+05 | ; O2 - C7    |
|   | 17 | 18 | 1     | 1.4560e-01 | 2.8008e+05 | ; C7 - N2    |
|   | 17 | 35 | 1     | 1.1000e-01 | 2.7313e+05 | ; C7 - HC72  |
|   | 17 | 36 | 1     | 1.1000e-01 | 2.7313e+05 | ; C7 - HC73  |
|   | 18 | 19 | 1     | 1.3500e-01 | 3.9355e+05 | ; N2 - C5    |
|   | 18 | 23 | 1     | 1.3500e-01 | 3.9355e+05 | ; N2 - C4    |
|   | 19 | 20 | 1     | 1.0880e-01 | 2.8694e+05 | ; C5 - H5    |
|   | 19 | 21 | 1     | 1.3870e-01 | 4.0033e+05 | ; C5 - C6    |
|   | 21 | 22 | 1     | 1.0870e-01 | 2.8811e+05 | ; C6 - H6    |
|   | 21 | 27 | 1     | 1.3870e-01 | 4.0033e+05 | ; C6 - C2    |
|   | 23 | 24 | 1     | 1.0880e-01 | 2.8694e+05 | ; C4 - H4    |
|   | 23 | 25 | 1     | 1.3870e-01 | 4.0033e+05 | ; C4 - C3    |
|   | 25 | 26 | 1     | 1.0870e-01 | 2.8811e+05 | ; C3 - H31   |
|   | 25 | 27 | 1     | 1.3870e-01 | 4.0033e+05 | ; C3 - C2    |
|   | 27 | 28 | 1     | 1.4720e-01 | 3.0627e+05 | ; C2 - C1    |
|   | 28 | 29 | 1     | 1.2790e-01 | 5.0191e+05 | ; C1 - N1    |
|   | 28 | 37 | 1     | 1.0916e-01 | 2.8267e+05 | ; C1 - HC1   |
|   | 29 | 30 | 1     | 1.3940e-01 | 3.4828e+05 | ; N1 - O1    |
|   | 30 | 31 | 1     | 9.7400e-02 | 3.0928e+05 | ; O1 - H15   |

[ pairs ]

| ; | ai | aj | funct         |
|---|----|----|---------------|
|   | 1  | 5  | 1 ; O3 - C11  |
|   | 1  | 32 | 1 ; O3 - HC14 |
|   | 2  | 4  | 1 ; H32 - C14 |
|   | 3  | 6  | 1 ; N4 - C12  |
|   | 3  | 10 | 1 ; N4 - C10  |
|   | 4  | 7  | 1 ; C14 - H12 |
|   | 4  | 8  | 1 ; C14 - C13 |
|   | 4  | 11 | 1 ; C14 - H10 |
|   | 4  | 12 | 1 ; C14 - C9  |
|   | 5  | 9  | 1 ; C11 - H13 |
|   | 5  | 13 | 1 ; C11 - H9  |
|   | 5  | 14 | 1 ; C11 - N3  |

|    |    |     |            |
|----|----|-----|------------|
| 6  | 11 | 1 ; | C12 - H10  |
| 6  | 12 | 1 ; | C12 - C9   |
| 6  | 15 | 1 ; | C12 - C8   |
| 6  | 32 | 1 ; | C12 - HC14 |
| 7  | 9  | 1 ; | H12 - H13  |
| 7  | 10 | 1 ; | H12 - C10  |
| 7  | 14 | 1 ; | H12 - N3   |
| 8  | 10 | 1 ; | C13 - C10  |
| 8  | 13 | 1 ; | C13 - H9   |
| 8  | 16 | 1 ; | C13 - O2   |
| 8  | 33 | 1 ; | C13 - HC82 |
| 8  | 34 | 1 ; | C13 - HC83 |
| 9  | 12 | 1 ; | H13 - C9   |
| 9  | 15 | 1 ; | H13 - C8   |
| 10 | 15 | 1 ; | C10 - C8   |
| 10 | 32 | 1 ; | C10 - HC14 |
| 11 | 13 | 1 ; | H10 - H9   |
| 11 | 14 | 1 ; | H10 - N3   |
| 12 | 16 | 1 ; | C9 - O2    |
| 12 | 33 | 1 ; | C9 - HC82  |
| 12 | 34 | 1 ; | C9 - HC83  |
| 13 | 15 | 1 ; | H9 - C8    |
| 14 | 17 | 1 ; | N3 - C7    |
| 15 | 18 | 1 ; | C8 - N2    |
| 15 | 35 | 1 ; | C8 - HC72  |
| 15 | 36 | 1 ; | C8 - HC73  |
| 16 | 19 | 1 ; | O2 - C5    |
| 16 | 23 | 1 ; | O2 - C4    |
| 17 | 20 | 1 ; | C7 - H5    |
| 17 | 21 | 1 ; | C7 - C6    |
| 17 | 24 | 1 ; | C7 - H4    |
| 17 | 25 | 1 ; | C7 - C3    |
| 17 | 33 | 1 ; | C7 - HC82  |
| 17 | 34 | 1 ; | C7 - HC83  |
| 18 | 22 | 1 ; | N2 - H6    |
| 18 | 26 | 1 ; | N2 - H31   |
| 18 | 27 | 1 ; | N2 - C2    |
| 19 | 24 | 1 ; | C5 - H4    |
| 19 | 25 | 1 ; | C5 - C3    |
| 19 | 28 | 1 ; | C5 - C1    |
| 19 | 35 | 1 ; | C5 - HC72  |
| 19 | 36 | 1 ; | C5 - HC73  |
| 20 | 22 | 1 ; | H5 - H6    |
| 20 | 23 | 1 ; | H5 - C4    |
| 20 | 27 | 1 ; | H5 - C2    |
| 21 | 23 | 1 ; | C6 - C4    |
| 21 | 26 | 1 ; | C6 - H31   |
| 21 | 29 | 1 ; | C6 - N1    |
| 21 | 37 | 1 ; | C6 - HC1   |
| 22 | 25 | 1 ; | H6 - C3    |
| 22 | 28 | 1 ; | H6 - C1    |
| 23 | 28 | 1 ; | C4 - C1    |
| 23 | 35 | 1 ; | C4 - HC72  |
| 23 | 36 | 1 ; | C4 - HC73  |
| 24 | 26 | 1 ; | H4 - H31   |
| 24 | 27 | 1 ; | H4 - C2    |
| 25 | 29 | 1 ; | C3 - N1    |
| 25 | 37 | 1 ; | C3 - HC1   |
| 26 | 28 | 1 ; | H31 - C1   |
| 27 | 30 | 1 ; | C2 - O1    |
| 28 | 31 | 1 ; | C1 - H15   |
| 30 | 37 | 1 ; | O1 - HC1   |

[ angles ]

| ; | ai | aj | ak | funct | theta      | cth          |           |        |
|---|----|----|----|-------|------------|--------------|-----------|--------|
|   | 1  | 3  | 4  | 1     | 1.1348e+02 | 5.9789e+02 ; | O3 - N4   | - C14  |
|   | 2  | 1  | 3  | 1     | 1.0274e+02 | 4.2317e+02 ; | H32 - O3  | - N4   |
|   | 3  | 4  | 5  | 1     | 1.2072e+02 | 5.7329e+02 ; | N4 - C14  | - C11  |
|   | 3  | 4  | 32 | 1     | 1.2152e+02 | 4.3823e+02 ; | N4 - C14  | - HC14 |
|   | 4  | 5  | 6  | 1     | 1.2066e+02 | 5.4292e+02 ; | C14 - C11 | - C12  |
|   | 4  | 5  | 10 | 1     | 1.2066e+02 | 5.4292e+02 ; | C14 - C11 | - C10  |



|           |      |      |      |      |          |         |           |          |         |
|-----------|------|------|------|------|----------|---------|-----------|----------|---------|
| 4         | 5    | 10   | 11   | 3    | 30.33400 | 0.00000 | -30.33400 | 0.00000  | 0.00000 |
| 0.00000 ; | C14- | C11- | C10- | H10  |          |         |           |          |         |
| 4         | 5    | 10   | 12   | 3    | 30.33400 | 0.00000 | -30.33400 | 0.00000  | 0.00000 |
| 0.00000 ; | C14- | C11- | C10- | C9   |          |         |           |          |         |
| 5         | 6    | 8    | 9    | 3    | 30.33400 | 0.00000 | -30.33400 | 0.00000  | 0.00000 |
| 0.00000 ; | C11- | C12- | C13- | H13  |          |         |           |          |         |
| 5         | 6    | 8    | 14   | 3    | 30.33400 | 0.00000 | -30.33400 | 0.00000  | 0.00000 |
| 0.00000 ; | C11- | C12- | C13- | N3   |          |         |           |          |         |
| 5         | 10   | 12   | 13   | 3    | 30.33400 | 0.00000 | -30.33400 | 0.00000  | 0.00000 |
| 0.00000 ; | C11- | C10- | C9-  | H9   |          |         |           |          |         |
| 5         | 10   | 12   | 14   | 3    | 30.33400 | 0.00000 | -30.33400 | 0.00000  | 0.00000 |
| 0.00000 ; | C11- | C10- | C9-  | N3   |          |         |           |          |         |
| 6         | 5    | 4    | 32   | 3    | 55.64720 | 0.00000 | -55.64720 | 0.00000  | 0.00000 |
| 0.00000 ; | C12- | C11- | C14- | HC14 |          |         |           |          |         |
| 6         | 5    | 10   | 11   | 3    | 30.33400 | 0.00000 | -30.33400 | 0.00000  | 0.00000 |
| 0.00000 ; | C12- | C11- | C10- | H10  |          |         |           |          |         |
| 6         | 5    | 10   | 12   | 3    | 30.33400 | 0.00000 | -30.33400 | 0.00000  | 0.00000 |
| 0.00000 ; | C12- | C11- | C10- | C9   |          |         |           |          |         |
| 6         | 8    | 14   | 12   | 3    | 2.51040  | 0.00000 | -2.51040  | 0.00000  | 0.00000 |
| 0.00000 ; | C12- | C13- | N3-  | C9   |          |         |           |          |         |
| 6         | 8    | 14   | 15   | 3    | 2.51040  | 0.00000 | -2.51040  | 0.00000  | 0.00000 |
| 0.00000 ; | C12- | C13- | N3-  | C8   |          |         |           |          |         |
| 7         | 6    | 5    | 10   | 3    | 30.33400 | 0.00000 | -30.33400 | 0.00000  | 0.00000 |
| 0.00000 ; | H12- | C12- | C11- | C10  |          |         |           |          |         |
| 7         | 6    | 8    | 9    | 3    | 30.33400 | 0.00000 | -30.33400 | 0.00000  | 0.00000 |
| 0.00000 ; | H12- | C12- | C13- | H13  |          |         |           |          |         |
| 7         | 6    | 8    | 14   | 3    | 30.33400 | 0.00000 | -30.33400 | 0.00000  | 0.00000 |
| 0.00000 ; | H12- | C12- | C13- | N3   |          |         |           |          |         |
| 8         | 6    | 5    | 10   | 3    | 30.33400 | 0.00000 | -30.33400 | 0.00000  | 0.00000 |
| 0.00000 ; | C13- | C12- | C11- | C10  |          |         |           |          |         |
| 8         | 14   | 12   | 10   | 3    | 2.51040  | 0.00000 | -2.51040  | 0.00000  | 0.00000 |
| 0.00000 ; | C13- | N3-  | C9-  | C10  |          |         |           |          |         |
| 8         | 14   | 12   | 13   | 3    | 2.51040  | 0.00000 | -2.51040  | 0.00000  | 0.00000 |
| 0.00000 ; | C13- | N3-  | C9-  | H9   |          |         |           |          |         |
| 8         | 14   | 15   | 16   | 3    | 0.00000  | 0.00000 | 0.00000   | 0.00000  | 0.00000 |
| 0.00000 ; | C13- | N3-  | C8-  | O2   |          |         |           |          |         |
| 8         | 14   | 15   | 33   | 3    | 0.00000  | 0.00000 | 0.00000   | 0.00000  | 0.00000 |
| 0.00000 ; | C13- | N3-  | C8-  | HC82 |          |         |           |          |         |
| 8         | 14   | 15   | 34   | 3    | 0.00000  | 0.00000 | 0.00000   | 0.00000  | 0.00000 |
| 0.00000 ; | C13- | N3-  | C8-  | HC83 |          |         |           |          |         |
| 9         | 8    | 14   | 12   | 3    | 2.51040  | 0.00000 | -2.51040  | 0.00000  | 0.00000 |
| 0.00000 ; | H13- | C13- | N3-  | C9   |          |         |           |          |         |
| 9         | 8    | 14   | 15   | 3    | 2.51040  | 0.00000 | -2.51040  | 0.00000  | 0.00000 |
| 0.00000 ; | H13- | C13- | N3-  | C8   |          |         |           |          |         |
| 10        | 5    | 4    | 32   | 3    | 55.64720 | 0.00000 | -55.64720 | 0.00000  | 0.00000 |
| 0.00000 ; | C10- | C11- | C14- | HC14 |          |         |           |          |         |
| 10        | 12   | 14   | 15   | 3    | 2.51040  | 0.00000 | -2.51040  | 0.00000  | 0.00000 |
| 0.00000 ; | C10- | C9-  | N3-  | C8   |          |         |           |          |         |
| 11        | 10   | 12   | 13   | 3    | 30.33400 | 0.00000 | -30.33400 | 0.00000  | 0.00000 |
| 0.00000 ; | H10- | C10- | C9-  | H9   |          |         |           |          |         |
| 11        | 10   | 12   | 14   | 3    | 30.33400 | 0.00000 | -30.33400 | 0.00000  | 0.00000 |
| 0.00000 ; | H10- | C10- | C9-  | N3   |          |         |           |          |         |
| 12        | 14   | 15   | 16   | 3    | 0.00000  | 0.00000 | 0.00000   | 0.00000  | 0.00000 |
| 0.00000 ; | C9-  | N3-  | C8-  | O2   |          |         |           |          |         |
| 12        | 14   | 15   | 33   | 3    | 0.00000  | 0.00000 | 0.00000   | 0.00000  | 0.00000 |
| 0.00000 ; | C9-  | N3-  | C8-  | HC82 |          |         |           |          |         |
| 12        | 14   | 15   | 34   | 3    | 0.00000  | 0.00000 | 0.00000   | 0.00000  | 0.00000 |
| 0.00000 ; | C9-  | N3-  | C8-  | HC83 |          |         |           |          |         |
| 13        | 12   | 14   | 15   | 3    | 2.51040  | 0.00000 | -2.51040  | 0.00000  | 0.00000 |
| 0.00000 ; | H9-  | C9-  | N3-  | C8   |          |         |           |          |         |
| 14        | 15   | 16   | 17   | 3    | 1.60247  | 4.80742 | 5.43920   | -6.40989 | 0.00000 |
| 0.00000 ; | N3-  | C8-  | O2-  | C7   |          |         |           |          |         |
| 15        | 16   | 17   | 18   | 3    | 1.60247  | 4.80742 | 5.43920   | -6.40989 | 0.00000 |
| 0.00000 ; | C8-  | O2-  | C7-  | N2   |          |         |           |          |         |
| 15        | 16   | 17   | 35   | 3    | 1.60387  | 4.81160 | 0.00000   | -6.41547 | 0.00000 |
| 0.00000 ; | C8-  | O2-  | C7-  | HC72 |          |         |           |          |         |
| 15        | 16   | 17   | 36   | 3    | 1.60387  | 4.81160 | 0.00000   | -6.41547 | 0.00000 |
| 0.00000 ; | C8-  | O2-  | C7-  | HC73 |          |         |           |          |         |
| 16        | 17   | 18   | 19   | 3    | 0.00000  | 0.00000 | 0.00000   | 0.00000  | 0.00000 |
| 0.00000 ; | O2-  | C7-  | N2-  | C5   |          |         |           |          |         |

|           |      |     |     |      |          |         |           |          |         |
|-----------|------|-----|-----|------|----------|---------|-----------|----------|---------|
| 16        | 17   | 18  | 23  | 3    | 0.00000  | 0.00000 | 0.00000   | 0.00000  | 0.00000 |
| 0.00000 ; | O2-  | C7- | N2- | C4   |          |         |           |          |         |
| 17        | 16   | 15  | 33  | 3    | 1.60387  | 4.81160 | 0.00000   | -6.41547 | 0.00000 |
| 0.00000 ; | C7-  | O2- | C8- | HC82 |          |         |           |          |         |
| 17        | 16   | 15  | 34  | 3    | 1.60387  | 4.81160 | 0.00000   | -6.41547 | 0.00000 |
| 0.00000 ; | C7-  | O2- | C8- | HC83 |          |         |           |          |         |
| 17        | 18   | 19  | 20  | 3    | 2.51040  | 0.00000 | -2.51040  | 0.00000  | 0.00000 |
| 0.00000 ; | C7-  | N2- | C5- | H5   |          |         |           |          |         |
| 17        | 18   | 19  | 21  | 3    | 2.51040  | 0.00000 | -2.51040  | 0.00000  | 0.00000 |
| 0.00000 ; | C7-  | N2- | C5- | C6   |          |         |           |          |         |
| 17        | 18   | 23  | 24  | 3    | 2.51040  | 0.00000 | -2.51040  | 0.00000  | 0.00000 |
| 0.00000 ; | C7-  | N2- | C4- | H4   |          |         |           |          |         |
| 17        | 18   | 23  | 25  | 3    | 2.51040  | 0.00000 | -2.51040  | 0.00000  | 0.00000 |
| 0.00000 ; | C7-  | N2- | C4- | C3   |          |         |           |          |         |
| 18        | 19   | 21  | 22  | 3    | 30.33400 | 0.00000 | -30.33400 | 0.00000  | 0.00000 |
| 0.00000 ; | N2-  | C5- | C6- | H6   |          |         |           |          |         |
| 18        | 19   | 21  | 27  | 3    | 30.33400 | 0.00000 | -30.33400 | 0.00000  | 0.00000 |
| 0.00000 ; | N2-  | C5- | C6- | C2   |          |         |           |          |         |
| 18        | 23   | 25  | 26  | 3    | 30.33400 | 0.00000 | -30.33400 | 0.00000  | 0.00000 |
| 0.00000 ; | N2-  | C4- | C3- | H31  |          |         |           |          |         |
| 18        | 23   | 25  | 27  | 3    | 30.33400 | 0.00000 | -30.33400 | 0.00000  | 0.00000 |
| 0.00000 ; | N2-  | C4- | C3- | C2   |          |         |           |          |         |
| 19        | 18   | 17  | 35  | 3    | 0.00000  | 0.00000 | 0.00000   | 0.00000  | 0.00000 |
| 0.00000 ; | C5-  | N2- | C7- | HC72 |          |         |           |          |         |
| 19        | 18   | 17  | 36  | 3    | 0.00000  | 0.00000 | 0.00000   | 0.00000  | 0.00000 |
| 0.00000 ; | C5-  | N2- | C7- | HC73 |          |         |           |          |         |
| 19        | 18   | 23  | 24  | 3    | 2.51040  | 0.00000 | -2.51040  | 0.00000  | 0.00000 |
| 0.00000 ; | C5-  | N2- | C4- | H4   |          |         |           |          |         |
| 19        | 18   | 23  | 25  | 3    | 2.51040  | 0.00000 | -2.51040  | 0.00000  | 0.00000 |
| 0.00000 ; | C5-  | N2- | C4- | C3   |          |         |           |          |         |
| 19        | 21   | 27  | 25  | 3    | 30.33400 | 0.00000 | -30.33400 | 0.00000  | 0.00000 |
| 0.00000 ; | C5-  | C6- | C2- | C3   |          |         |           |          |         |
| 19        | 21   | 27  | 28  | 3    | 30.33400 | 0.00000 | -30.33400 | 0.00000  | 0.00000 |
| 0.00000 ; | C5-  | C6- | C2- | C1   |          |         |           |          |         |
| 20        | 19   | 18  | 23  | 3    | 2.51040  | 0.00000 | -2.51040  | 0.00000  | 0.00000 |
| 0.00000 ; | H5-  | C5- | N2- | C4   |          |         |           |          |         |
| 20        | 19   | 21  | 22  | 3    | 30.33400 | 0.00000 | -30.33400 | 0.00000  | 0.00000 |
| 0.00000 ; | H5-  | C5- | C6- | H6   |          |         |           |          |         |
| 20        | 19   | 21  | 27  | 3    | 30.33400 | 0.00000 | -30.33400 | 0.00000  | 0.00000 |
| 0.00000 ; | H5-  | C5- | C6- | C2   |          |         |           |          |         |
| 21        | 19   | 18  | 23  | 3    | 2.51040  | 0.00000 | -2.51040  | 0.00000  | 0.00000 |
| 0.00000 ; | C6-  | C5- | N2- | C4   |          |         |           |          |         |
| 21        | 27   | 25  | 23  | 3    | 30.33400 | 0.00000 | -30.33400 | 0.00000  | 0.00000 |
| 0.00000 ; | C6-  | C2- | C3- | C4   |          |         |           |          |         |
| 21        | 27   | 25  | 26  | 3    | 30.33400 | 0.00000 | -30.33400 | 0.00000  | 0.00000 |
| 0.00000 ; | C6-  | C2- | C3- | H31  |          |         |           |          |         |
| 21        | 27   | 28  | 29  | 3    | 21.33840 | 0.00000 | -21.33840 | 0.00000  | 0.00000 |
| 0.00000 ; | C6-  | C2- | C1- | N1   |          |         |           |          |         |
| 21        | 27   | 28  | 37  | 3    | 55.64720 | 0.00000 | -55.64720 | 0.00000  | 0.00000 |
| 0.00000 ; | C6-  | C2- | C1- | HC1  |          |         |           |          |         |
| 22        | 21   | 27  | 25  | 3    | 30.33400 | 0.00000 | -30.33400 | 0.00000  | 0.00000 |
| 0.00000 ; | H6-  | C6- | C2- | C3   |          |         |           |          |         |
| 22        | 21   | 27  | 28  | 3    | 30.33400 | 0.00000 | -30.33400 | 0.00000  | 0.00000 |
| 0.00000 ; | H6-  | C6- | C2- | C1   |          |         |           |          |         |
| 23        | 18   | 17  | 35  | 3    | 0.00000  | 0.00000 | 0.00000   | 0.00000  | 0.00000 |
| 0.00000 ; | C4-  | N2- | C7- | HC72 |          |         |           |          |         |
| 23        | 18   | 17  | 36  | 3    | 0.00000  | 0.00000 | 0.00000   | 0.00000  | 0.00000 |
| 0.00000 ; | C4-  | N2- | C7- | HC73 |          |         |           |          |         |
| 23        | 25   | 27  | 28  | 3    | 30.33400 | 0.00000 | -30.33400 | 0.00000  | 0.00000 |
| 0.00000 ; | C4-  | C3- | C2- | C1   |          |         |           |          |         |
| 24        | 23   | 25  | 26  | 3    | 30.33400 | 0.00000 | -30.33400 | 0.00000  | 0.00000 |
| 0.00000 ; | H4-  | C4- | C3- | H31  |          |         |           |          |         |
| 24        | 23   | 25  | 27  | 3    | 30.33400 | 0.00000 | -30.33400 | 0.00000  | 0.00000 |
| 0.00000 ; | H4-  | C4- | C3- | C2   |          |         |           |          |         |
| 25        | 27   | 28  | 29  | 3    | 21.33840 | 0.00000 | -21.33840 | 0.00000  | 0.00000 |
| 0.00000 ; | C3-  | C2- | C1- | N1   |          |         |           |          |         |
| 25        | 27   | 28  | 37  | 3    | 55.64720 | 0.00000 | -55.64720 | 0.00000  | 0.00000 |
| 0.00000 ; | C3-  | C2- | C1- | HC1  |          |         |           |          |         |
| 26        | 25   | 27  | 28  | 3    | 30.33400 | 0.00000 | -30.33400 | 0.00000  | 0.00000 |
| 0.00000 ; | H31- | C3- | C2- | C1   |          |         |           |          |         |

```

    27    28    29    30    3    34.72720    0.00000   -34.72720    0.00000    0.00000
0.00000 ;    C2-    C1-    N1-    O1
    28    29    30    31    3    26.77760    0.00000   -26.77760    0.00000    0.00000
0.00000 ;    C1-    N1-    O1-    H15
    30    29    28    37    3    34.72720    0.00000   -34.72720    0.00000    0.00000
0.00000 ;    O1-    N1-    C1-    HC1

```

```

[ dihedrals ] ; impropers
; treated as propers in GROMACS to use correct AMBER analytical function
;   i   j   k   l   func   phase   kd   pn
    5   8   6   7   1   180.00   4.60240   2 ;   C11-   C13-   C12-   H12
    5   12  10  11   1   180.00   4.60240   2 ;   C11-    C9-   C10-   H10
    5   32   4   3   1   180.00   4.60240   2 ;   C11-  HC14-  C14-   N4
    6   9   8   14   1   180.00   4.60240   2 ;   C12-   H13-   C13-   N3
    6   10  5   4   1   180.00   4.60240   2 ;   C12-   C10-   C11-   C14
    8   12  14  15   1   180.00   4.60240   2 ;   C13-    C9-   N3-    C8
    10  13  12  14   1   180.00   4.60240   2 ;   C10-   H9-    C9-    N3
    17  19  18  23   1   180.00   4.60240   2 ;    C7-    C5-   N2-    C4
    19  27  21  22   1   180.00   4.60240   2 ;    C5-    C2-   C6-    H6
    21  20  19  18   1   180.00   4.60240   2 ;    C6-    H5-   C5-    N2
    21  25  27  28   1   180.00   4.60240   2 ;    C6-    C3-   C2-    C1
    23  27  25  26   1   180.00   4.60240   2 ;    C4-    C2-   C3-   H31
    25  24  23  18   1   180.00   4.60240   2 ;    C3-    H4-   C4-    N2
    27  37  28  29   1   180.00   4.60240   2 ;    C2-   HC1-   C1-    N1

```

## (B) OBIF

```

[ atom types ]
;name  bond_type  mass  charge  ptype  sigma  epsilon
oh     oh         0.00000 0.00000  A     3.06647e-01  8.80314e-01
ho     ho         0.00000 0.00000  A     0.00000e+00  0.00000e+00
n2     n2         0.00000 0.00000  A     3.25000e-01  7.11280e-01
ce     ce         0.00000 0.00000  A     3.39967e-01  3.59824e-01
ca     ca         0.00000 0.00000  A     3.39967e-01  3.59824e-01
f      f          0.00000 0.00000  A     3.11815e-01  2.55224e-01
h4     h4         0.00000 0.00000  A     2.51055e-01  6.27600e-02
ha     ha         0.00000 0.00000  A     2.59964e-01  6.27600e-02
na     na         0.00000 0.00000  A     3.25000e-01  7.11280e-01
c3     c3         0.00000 0.00000  A     3.39967e-01  4.57730e-01
os     os         0.00000 0.00000  A     3.00001e-01  7.11280e-01
h2     h2         0.00000 0.00000  A     2.29317e-01  6.56888e-02

```

```

[ atoms ]
; nr  type  resi  res  atom  cgnr  charge  mass
    1  oh    1  OBI  O3    1     0.1518  16.00000
    2  ho    1  OBI  H32   2     0.3137   1.00800
    3  n2    1  OBI  N4    3    -0.3106  14.01000
    4  ce    1  OBI  C14   4    -0.4548  12.01000
    5  ca    1  OBI  C11   5     0.4968  12.01000
    6  ca    1  OBI  C12   6    -0.8190  12.01000
    7  f     1  OBI  F2    7    -0.1165  19.00000
    8  ca    1  OBI  C13   8     0.2461  12.01000
    9  h4    1  OBI  H13   9     0.2349   1.00800
   10  ca    1  OBI  C10  10     0.3531  12.01000
   11  ha    1  OBI  H10  11     0.3259   1.00800
   12  ca    1  OBI  C9   12    -0.0769  12.01000
   13  h4    1  OBI  H9   13     0.1846   1.00800
   14  na    1  OBI  N3   14     0.2366  14.01000
   15  c3    1  OBI  C8   15    -0.5219  12.01000
   16  os    1  OBI  O2   16     0.0207  16.00000
   17  c3    1  OBI  C7   17    -0.3979  12.01000
   18  na    1  OBI  N2   18     0.2457  14.01000
   19  ca    1  OBI  C5   19     0.2080  12.01000
   20  h4    1  OBI  H5   20     0.2409   1.00800
   21  ca    1  OBI  C6   21    -0.9735  12.01000
   22  f     1  OBI  F1   22    -0.1143  19.00000
   23  ca    1  OBI  C4   23    -0.5312  12.01000
   24  h4    1  OBI  H4   24     0.2199   1.00800

```

|    |    |   |     |      |    |         |          |
|----|----|---|-----|------|----|---------|----------|
| 25 | ca | 1 | OBI | C3   | 25 | 0.8431  | 12.01000 |
| 26 | ha | 1 | OBI | H31  | 26 | 0.3251  | 1.00800  |
| 27 | ca | 1 | OBI | C2   | 27 | 0.5801  | 12.01000 |
| 28 | ce | 1 | OBI | C1   | 28 | -0.4724 | 12.01000 |
| 29 | n2 | 1 | OBI | N1   | 29 | -0.3124 | 14.01000 |
| 30 | oh | 1 | OBI | O1   | 30 | 0.1504  | 16.00000 |
| 31 | ho | 1 | OBI | H15  | 31 | 0.3136  | 1.00800  |
| 32 | h4 | 1 | OBI | HC14 | 32 | 0.2553  | 1.00800  |
| 33 | h2 | 1 | OBI | HC82 | 33 | 0.2138  | 1.00800  |
| 34 | h2 | 1 | OBI | HC83 | 34 | 0.2209  | 1.00800  |
| 35 | h2 | 1 | OBI | HC72 | 35 | 0.1934  | 1.00800  |
| 36 | h2 | 1 | OBI | HC73 | 36 | 0.2725  | 1.00800  |
| 37 | h4 | 1 | OBI | HC1  | 37 | 0.2545  | 1.00800  |

[ bonds ]

| ; | ai | aj | funct | r          | k          |              |
|---|----|----|-------|------------|------------|--------------|
|   | 1  | 2  | 1     | 9.7400e-02 | 3.0928e+05 | ; O3 - H32   |
|   | 1  | 3  | 1     | 1.3940e-01 | 3.4828e+05 | ; O3 - N4    |
|   | 3  | 4  | 1     | 1.2790e-01 | 5.0191e+05 | ; N4 - C14   |
|   | 4  | 5  | 1     | 1.4720e-01 | 3.0627e+05 | ; C14 - C11  |
|   | 4  | 32 | 1     | 1.0916e-01 | 2.8267e+05 | ; C14 - HC14 |
|   | 5  | 6  | 1     | 1.3870e-01 | 4.0033e+05 | ; C11 - C12  |
|   | 5  | 10 | 1     | 1.3870e-01 | 4.0033e+05 | ; C11 - C10  |
|   | 6  | 7  | 1     | 1.3440e-01 | 3.0443e+05 | ; C12 - F2   |
|   | 6  | 8  | 1     | 1.3870e-01 | 4.0033e+05 | ; C12 - C13  |
|   | 8  | 9  | 1     | 1.0880e-01 | 2.8694e+05 | ; C13 - H13  |
|   | 8  | 14 | 1     | 1.3500e-01 | 3.9355e+05 | ; C13 - N3   |
|   | 10 | 11 | 1     | 1.0870e-01 | 2.8811e+05 | ; C10 - H10  |
|   | 10 | 12 | 1     | 1.3870e-01 | 4.0033e+05 | ; C10 - C9   |
|   | 12 | 13 | 1     | 1.0880e-01 | 2.8694e+05 | ; C9 - H9    |
|   | 12 | 14 | 1     | 1.3500e-01 | 3.9355e+05 | ; C9 - N3    |
|   | 14 | 15 | 1     | 1.4560e-01 | 2.8008e+05 | ; N3 - C8    |
|   | 15 | 16 | 1     | 1.4390e-01 | 2.5230e+05 | ; C8 - O2    |
|   | 15 | 33 | 1     | 1.1000e-01 | 2.7313e+05 | ; C8 - HC82  |
|   | 15 | 34 | 1     | 1.1000e-01 | 2.7313e+05 | ; C8 - HC83  |
|   | 16 | 17 | 1     | 1.4390e-01 | 2.5230e+05 | ; O2 - C7    |
|   | 17 | 18 | 1     | 1.4560e-01 | 2.8008e+05 | ; C7 - N2    |
|   | 17 | 35 | 1     | 1.1000e-01 | 2.7313e+05 | ; C7 - HC72  |
|   | 17 | 36 | 1     | 1.1000e-01 | 2.7313e+05 | ; C7 - HC73  |
|   | 18 | 19 | 1     | 1.3500e-01 | 3.9355e+05 | ; N2 - C5    |
|   | 18 | 23 | 1     | 1.3500e-01 | 3.9355e+05 | ; N2 - C4    |
|   | 19 | 20 | 1     | 1.0880e-01 | 2.8694e+05 | ; C5 - H5    |
|   | 19 | 21 | 1     | 1.3870e-01 | 4.0033e+05 | ; C5 - C6    |
|   | 21 | 22 | 1     | 1.3440e-01 | 3.0443e+05 | ; C6 - F1    |
|   | 21 | 27 | 1     | 1.3870e-01 | 4.0033e+05 | ; C6 - C2    |
|   | 23 | 24 | 1     | 1.0880e-01 | 2.8694e+05 | ; C4 - H4    |
|   | 23 | 25 | 1     | 1.3870e-01 | 4.0033e+05 | ; C4 - C3    |
|   | 25 | 26 | 1     | 1.0870e-01 | 2.8811e+05 | ; C3 - H31   |
|   | 25 | 27 | 1     | 1.3870e-01 | 4.0033e+05 | ; C3 - C2    |
|   | 27 | 28 | 1     | 1.4720e-01 | 3.0627e+05 | ; C2 - C1    |
|   | 28 | 29 | 1     | 1.2790e-01 | 5.0191e+05 | ; C1 - N1    |
|   | 28 | 37 | 1     | 1.0916e-01 | 2.8267e+05 | ; C1 - HC1   |
|   | 29 | 30 | 1     | 1.3940e-01 | 3.4828e+05 | ; N1 - O1    |
|   | 30 | 31 | 1     | 9.7400e-02 | 3.0928e+05 | ; O1 - H15   |

[ pairs ]

| ; | ai | aj | funct |           |
|---|----|----|-------|-----------|
|   | 1  | 5  | 1 ;   | O3 - C11  |
|   | 1  | 32 | 1 ;   | O3 - HC14 |
|   | 2  | 4  | 1 ;   | H32 - C14 |
|   | 3  | 6  | 1 ;   | N4 - C12  |
|   | 3  | 10 | 1 ;   | N4 - C10  |
|   | 4  | 7  | 1 ;   | C14 - F2  |
|   | 4  | 8  | 1 ;   | C14 - C13 |
|   | 4  | 11 | 1 ;   | C14 - H10 |
|   | 4  | 12 | 1 ;   | C14 - C9  |
|   | 5  | 9  | 1 ;   | C11 - H13 |
|   | 5  | 13 | 1 ;   | C11 - H9  |
|   | 5  | 14 | 1 ;   | C11 - N3  |
|   | 6  | 11 | 1 ;   | C12 - H10 |
|   | 6  | 12 | 1 ;   | C12 - C9  |



|    |    |     |            |
|----|----|-----|------------|
| 6  | 15 | 1 ; | C12 - C8   |
| 6  | 32 | 1 ; | C12 - HC14 |
| 7  | 9  | 1 ; | F2 - H13   |
| 7  | 10 | 1 ; | F2 - C10   |
| 7  | 14 | 1 ; | F2 - N3    |
| 8  | 10 | 1 ; | C13 - C10  |
| 8  | 13 | 1 ; | C13 - H9   |
| 8  | 16 | 1 ; | C13 - O2   |
| 8  | 33 | 1 ; | C13 - HC82 |
| 8  | 34 | 1 ; | C13 - HC83 |
| 9  | 12 | 1 ; | H13 - C9   |
| 9  | 15 | 1 ; | H13 - C8   |
| 10 | 15 | 1 ; | C10 - C8   |
| 10 | 32 | 1 ; | C10 - HC14 |
| 11 | 13 | 1 ; | H10 - H9   |
| 11 | 14 | 1 ; | H10 - N3   |
| 12 | 16 | 1 ; | C9 - O2    |
| 12 | 33 | 1 ; | C9 - HC82  |
| 12 | 34 | 1 ; | C9 - HC83  |
| 13 | 15 | 1 ; | H9 - C8    |
| 14 | 17 | 1 ; | N3 - C7    |
| 15 | 18 | 1 ; | C8 - N2    |
| 15 | 35 | 1 ; | C8 - HC72  |
| 15 | 36 | 1 ; | C8 - HC73  |
| 16 | 19 | 1 ; | O2 - C5    |
| 16 | 23 | 1 ; | O2 - C4    |
| 17 | 20 | 1 ; | C7 - H5    |
| 17 | 21 | 1 ; | C7 - C6    |
| 17 | 24 | 1 ; | C7 - H4    |
| 17 | 25 | 1 ; | C7 - C3    |
| 17 | 33 | 1 ; | C7 - HC82  |
| 17 | 34 | 1 ; | C7 - HC83  |
| 18 | 22 | 1 ; | N2 - F1    |
| 18 | 26 | 1 ; | N2 - H31   |
| 18 | 27 | 1 ; | N2 - C2    |
| 19 | 24 | 1 ; | C5 - H4    |
| 19 | 25 | 1 ; | C5 - C3    |
| 19 | 28 | 1 ; | C5 - C1    |
| 19 | 35 | 1 ; | C5 - HC72  |
| 19 | 36 | 1 ; | C5 - HC73  |
| 20 | 22 | 1 ; | H5 - F1    |
| 20 | 23 | 1 ; | H5 - C4    |
| 20 | 27 | 1 ; | H5 - C2    |
| 21 | 23 | 1 ; | C6 - C4    |
| 21 | 26 | 1 ; | C6 - H31   |
| 21 | 29 | 1 ; | C6 - N1    |
| 21 | 37 | 1 ; | C6 - HC1   |
| 22 | 25 | 1 ; | F1 - C3    |
| 22 | 28 | 1 ; | F1 - C1    |
| 23 | 28 | 1 ; | C4 - C1    |
| 23 | 35 | 1 ; | C4 - HC72  |
| 23 | 36 | 1 ; | C4 - HC73  |
| 24 | 26 | 1 ; | H4 - H31   |
| 24 | 27 | 1 ; | H4 - C2    |
| 25 | 29 | 1 ; | C3 - N1    |
| 25 | 37 | 1 ; | C3 - HC1   |
| 26 | 28 | 1 ; | H31 - C1   |
| 27 | 30 | 1 ; | C2 - O1    |
| 28 | 31 | 1 ; | C1 - H15   |
| 30 | 37 | 1 ; | O1 - HC1   |

[ angles ]

| ; | ai | aj | ak | funct | theta      | cth          |           |        |
|---|----|----|----|-------|------------|--------------|-----------|--------|
|   | 1  | 3  | 4  | 1     | 1.1348e+02 | 5.9789e+02 ; | O3 - N4   | - C14  |
|   | 2  | 1  | 3  | 1     | 1.0274e+02 | 4.2317e+02 ; | H32 - O3  | - N4   |
|   | 3  | 4  | 5  | 1     | 1.2072e+02 | 5.7329e+02 ; | N4 - C14  | - C11  |
|   | 3  | 4  | 32 | 1     | 1.2152e+02 | 4.3823e+02 ; | N4 - C14  | - HC14 |
|   | 4  | 5  | 6  | 1     | 1.2066e+02 | 5.4292e+02 ; | C14 - C11 | - C12  |
|   | 4  | 5  | 10 | 1     | 1.2066e+02 | 5.4292e+02 ; | C14 - C11 | - C10  |
|   | 5  | 4  | 32 | 1     | 1.1686e+02 | 3.9087e+02 ; | C11 - C14 | - HC14 |
|   | 5  | 6  | 7  | 1     | 1.1895e+02 | 5.6492e+02 ; | C11 - C12 | - F2   |

|    |    |    |   |            |              |           |        |
|----|----|----|---|------------|--------------|-----------|--------|
| 5  | 6  | 8  | 1 | 1.1997e+02 | 5.6216e+02 ; | C11 - C12 | - C13  |
| 5  | 10 | 11 | 1 | 1.2001e+02 | 4.0551e+02 ; | C11 - C10 | - H10  |
| 5  | 10 | 12 | 1 | 1.1997e+02 | 5.6216e+02 ; | C11 - C10 | - C9   |
| 6  | 5  | 10 | 1 | 1.1997e+02 | 5.6216e+02 ; | C12 - C11 | - C10  |
| 6  | 8  | 9  | 1 | 1.2109e+02 | 4.0367e+02 ; | C12 - C13 | - H13  |
| 6  | 8  | 14 | 1 | 1.1834e+02 | 5.8752e+02 ; | C12 - C13 | - N3   |
| 7  | 6  | 8  | 1 | 1.1895e+02 | 5.6492e+02 ; | F2 - C12  | - C13  |
| 8  | 14 | 12 | 1 | 1.2009e+02 | 5.6049e+02 ; | C13 - N3  | - C9   |
| 8  | 14 | 15 | 1 | 1.2436e+02 | 5.2844e+02 ; | C13 - N3  | - C8   |
| 9  | 8  | 14 | 1 | 1.1465e+02 | 4.3413e+02 ; | H13 - C13 | - N3   |
| 10 | 12 | 13 | 1 | 1.2109e+02 | 4.0367e+02 ; | C10 - C9  | - H9   |
| 10 | 12 | 14 | 1 | 1.1834e+02 | 5.8752e+02 ; | C10 - C9  | - N3   |
| 11 | 10 | 12 | 1 | 1.2001e+02 | 4.0551e+02 ; | H10 - C10 | - C9   |
| 12 | 14 | 15 | 1 | 1.2436e+02 | 5.2844e+02 ; | C9 - N3   | - C8   |
| 13 | 12 | 14 | 1 | 1.1465e+02 | 4.3413e+02 ; | H9 - C9   | - N3   |
| 14 | 15 | 16 | 1 | 1.0906e+02 | 5.9639e+02 ; | N3 - C8   | - O2   |
| 14 | 15 | 33 | 1 | 1.0766e+02 | 4.2066e+02 ; | N3 - C8   | - HC82 |
| 14 | 15 | 34 | 1 | 1.0766e+02 | 4.2066e+02 ; | N3 - C8   | - HC83 |
| 15 | 16 | 17 | 1 | 1.1245e+02 | 5.2208e+02 ; | C8 - O2   | - C7   |
| 16 | 15 | 33 | 1 | 1.0858e+02 | 4.2543e+02 ; | O2 - C8   | - HC82 |
| 16 | 15 | 34 | 1 | 1.0858e+02 | 4.2543e+02 ; | O2 - C8   | - HC83 |
| 16 | 17 | 18 | 1 | 1.0906e+02 | 5.9639e+02 ; | O2 - C7   | - N2   |
| 16 | 17 | 35 | 1 | 1.0858e+02 | 4.2543e+02 ; | O2 - C7   | - HC72 |
| 16 | 17 | 36 | 1 | 1.0858e+02 | 4.2543e+02 ; | O2 - C7   | - HC73 |
| 17 | 18 | 19 | 1 | 1.2436e+02 | 5.2844e+02 ; | C7 - N2   | - C5   |
| 17 | 18 | 23 | 1 | 1.2436e+02 | 5.2844e+02 ; | C7 - N2   | - C4   |
| 18 | 17 | 35 | 1 | 1.0766e+02 | 4.2066e+02 ; | N2 - C7   | - HC72 |
| 18 | 17 | 36 | 1 | 1.0766e+02 | 4.2066e+02 ; | N2 - C7   | - HC73 |
| 18 | 19 | 20 | 1 | 1.1465e+02 | 4.3413e+02 ; | N2 - C5   | - H5   |
| 18 | 19 | 21 | 1 | 1.1834e+02 | 5.8752e+02 ; | N2 - C5   | - C6   |
| 18 | 23 | 24 | 1 | 1.1465e+02 | 4.3413e+02 ; | N2 - C4   | - H4   |
| 18 | 23 | 25 | 1 | 1.1834e+02 | 5.8752e+02 ; | N2 - C4   | - C3   |
| 19 | 18 | 23 | 1 | 1.2009e+02 | 5.6049e+02 ; | C5 - N2   | - C4   |
| 19 | 21 | 22 | 1 | 1.1895e+02 | 5.6492e+02 ; | C5 - C6   | - F1   |
| 19 | 21 | 27 | 1 | 1.1997e+02 | 5.6216e+02 ; | C5 - C6   | - C2   |
| 20 | 19 | 21 | 1 | 1.2109e+02 | 4.0367e+02 ; | H5 - C5   | - C6   |
| 21 | 27 | 25 | 1 | 1.1997e+02 | 5.6216e+02 ; | C6 - C2   | - C3   |
| 21 | 27 | 28 | 1 | 1.2066e+02 | 5.4292e+02 ; | C6 - C2   | - C1   |
| 22 | 21 | 27 | 1 | 1.1895e+02 | 5.6492e+02 ; | F1 - C6   | - C2   |
| 23 | 25 | 26 | 1 | 1.2001e+02 | 4.0551e+02 ; | C4 - C3   | - H31  |
| 23 | 25 | 27 | 1 | 1.1997e+02 | 5.6216e+02 ; | C4 - C3   | - C2   |
| 24 | 23 | 25 | 1 | 1.2109e+02 | 4.0367e+02 ; | H4 - C4   | - C3   |
| 25 | 27 | 28 | 1 | 1.2066e+02 | 5.4292e+02 ; | C3 - C2   | - C1   |
| 26 | 25 | 27 | 1 | 1.2001e+02 | 4.0551e+02 ; | H31 - C3  | - C2   |
| 27 | 28 | 29 | 1 | 1.2072e+02 | 5.7329e+02 ; | C2 - C1   | - N1   |
| 27 | 28 | 37 | 1 | 1.1686e+02 | 3.9087e+02 ; | C2 - C1   | - HC1  |
| 28 | 29 | 30 | 1 | 1.1348e+02 | 5.9789e+02 ; | C1 - N1   | - O1   |
| 29 | 28 | 37 | 1 | 1.2152e+02 | 4.3823e+02 ; | N1 - C1   | - HC1  |
| 29 | 30 | 31 | 1 | 1.0274e+02 | 4.2317e+02 ; | N1 - O1   | - H15  |
| 33 | 15 | 34 | 1 | 1.0919e+02 | 3.2635e+02 ; | HC82 - C8 | - HC83 |
| 35 | 17 | 36 | 1 | 1.0919e+02 | 3.2635e+02 ; | HC72 - C7 | - HC73 |

```
[ dihedrals ] ; props
; treated as RBs in GROMACS to use combine multiple AMBER torsions per quartet
; i j k l func C0 C1 C2 C3 C4 C5
1 3 4 5 3 34.72720 0.00000 -34.72720 0.00000 0.00000
0.00000 ; O3- N4- C14- C11
1 3 4 32 3 34.72720 0.00000 -34.72720 0.00000 0.00000
0.00000 ; O3- N4- C14- HC14
2 1 3 4 3 26.77760 0.00000 -26.77760 0.00000 0.00000
0.00000 ; H32- O3- N4- C14
3 4 5 6 3 21.33840 0.00000 -21.33840 0.00000 0.00000
0.00000 ; N4- C14- C11- C12
3 4 5 10 3 21.33840 0.00000 -21.33840 0.00000 0.00000
0.00000 ; N4- C14- C11- C10
4 5 6 7 3 30.33400 0.00000 -30.33400 0.00000 0.00000
0.00000 ; C14- C11- C12- F2
4 5 6 8 3 30.33400 0.00000 -30.33400 0.00000 0.00000
0.00000 ; C14- C11- C12- C13
4 5 10 11 3 30.33400 0.00000 -30.33400 0.00000 0.00000
0.00000 ; C14- C11- C10- H10
```

|           |      |      |      |      |          |         |           |          |         |
|-----------|------|------|------|------|----------|---------|-----------|----------|---------|
| 4         | 5    | 10   | 12   | 3    | 30.33400 | 0.00000 | -30.33400 | 0.00000  | 0.00000 |
| 0.00000 ; | C14- | C11- | C10- | C9   |          |         |           |          |         |
| 5         | 6    | 8    | 9    | 3    | 30.33400 | 0.00000 | -30.33400 | 0.00000  | 0.00000 |
| 0.00000 ; | C11- | C12- | C13- | H13  |          |         |           |          |         |
| 5         | 6    | 8    | 14   | 3    | 30.33400 | 0.00000 | -30.33400 | 0.00000  | 0.00000 |
| 0.00000 ; | C11- | C12- | C13- | N3   |          |         |           |          |         |
| 5         | 10   | 12   | 13   | 3    | 30.33400 | 0.00000 | -30.33400 | 0.00000  | 0.00000 |
| 0.00000 ; | C11- | C10- | C9-  | H9   |          |         |           |          |         |
| 5         | 10   | 12   | 14   | 3    | 30.33400 | 0.00000 | -30.33400 | 0.00000  | 0.00000 |
| 0.00000 ; | C11- | C10- | C9-  | N3   |          |         |           |          |         |
| 6         | 5    | 4    | 32   | 3    | 55.64720 | 0.00000 | -55.64720 | 0.00000  | 0.00000 |
| 0.00000 ; | C12- | C11- | C14- | HC14 |          |         |           |          |         |
| 6         | 5    | 10   | 11   | 3    | 30.33400 | 0.00000 | -30.33400 | 0.00000  | 0.00000 |
| 0.00000 ; | C12- | C11- | C10- | H10  |          |         |           |          |         |
| 6         | 5    | 10   | 12   | 3    | 30.33400 | 0.00000 | -30.33400 | 0.00000  | 0.00000 |
| 0.00000 ; | C12- | C11- | C10- | C9   |          |         |           |          |         |
| 6         | 8    | 14   | 12   | 3    | 2.51040  | 0.00000 | -2.51040  | 0.00000  | 0.00000 |
| 0.00000 ; | C12- | C13- | N3-  | C9   |          |         |           |          |         |
| 6         | 8    | 14   | 15   | 3    | 2.51040  | 0.00000 | -2.51040  | 0.00000  | 0.00000 |
| 0.00000 ; | C12- | C13- | N3-  | C8   |          |         |           |          |         |
| 7         | 6    | 5    | 10   | 3    | 30.33400 | 0.00000 | -30.33400 | 0.00000  | 0.00000 |
| 0.00000 ; | F2-  | C12- | C11- | C10  |          |         |           |          |         |
| 7         | 6    | 8    | 9    | 3    | 30.33400 | 0.00000 | -30.33400 | 0.00000  | 0.00000 |
| 0.00000 ; | F2-  | C12- | C13- | H13  |          |         |           |          |         |
| 7         | 6    | 8    | 14   | 3    | 30.33400 | 0.00000 | -30.33400 | 0.00000  | 0.00000 |
| 0.00000 ; | F2-  | C12- | C13- | N3   |          |         |           |          |         |
| 8         | 6    | 5    | 10   | 3    | 30.33400 | 0.00000 | -30.33400 | 0.00000  | 0.00000 |
| 0.00000 ; | C13- | C12- | C11- | C10  |          |         |           |          |         |
| 8         | 14   | 12   | 10   | 3    | 2.51040  | 0.00000 | -2.51040  | 0.00000  | 0.00000 |
| 0.00000 ; | C13- | N3-  | C9-  | C10  |          |         |           |          |         |
| 8         | 14   | 12   | 13   | 3    | 2.51040  | 0.00000 | -2.51040  | 0.00000  | 0.00000 |
| 0.00000 ; | C13- | N3-  | C9-  | H9   |          |         |           |          |         |
| 8         | 14   | 15   | 16   | 3    | 0.00000  | 0.00000 | 0.00000   | 0.00000  | 0.00000 |
| 0.00000 ; | C13- | N3-  | C8-  | O2   |          |         |           |          |         |
| 8         | 14   | 15   | 33   | 3    | 0.00000  | 0.00000 | 0.00000   | 0.00000  | 0.00000 |
| 0.00000 ; | C13- | N3-  | C8-  | HC82 |          |         |           |          |         |
| 8         | 14   | 15   | 34   | 3    | 0.00000  | 0.00000 | 0.00000   | 0.00000  | 0.00000 |
| 0.00000 ; | C13- | N3-  | C8-  | HC83 |          |         |           |          |         |
| 9         | 8    | 14   | 12   | 3    | 2.51040  | 0.00000 | -2.51040  | 0.00000  | 0.00000 |
| 0.00000 ; | H13- | C13- | N3-  | C9   |          |         |           |          |         |
| 9         | 8    | 14   | 15   | 3    | 2.51040  | 0.00000 | -2.51040  | 0.00000  | 0.00000 |
| 0.00000 ; | H13- | C13- | N3-  | C8   |          |         |           |          |         |
| 10        | 5    | 4    | 32   | 3    | 55.64720 | 0.00000 | -55.64720 | 0.00000  | 0.00000 |
| 0.00000 ; | C10- | C11- | C14- | HC14 |          |         |           |          |         |
| 10        | 12   | 14   | 15   | 3    | 2.51040  | 0.00000 | -2.51040  | 0.00000  | 0.00000 |
| 0.00000 ; | C10- | C9-  | N3-  | C8   |          |         |           |          |         |
| 11        | 10   | 12   | 13   | 3    | 30.33400 | 0.00000 | -30.33400 | 0.00000  | 0.00000 |
| 0.00000 ; | H10- | C10- | C9-  | H9   |          |         |           |          |         |
| 11        | 10   | 12   | 14   | 3    | 30.33400 | 0.00000 | -30.33400 | 0.00000  | 0.00000 |
| 0.00000 ; | H10- | C10- | C9-  | N3   |          |         |           |          |         |
| 12        | 14   | 15   | 16   | 3    | 0.00000  | 0.00000 | 0.00000   | 0.00000  | 0.00000 |
| 0.00000 ; | C9-  | N3-  | C8-  | O2   |          |         |           |          |         |
| 12        | 14   | 15   | 33   | 3    | 0.00000  | 0.00000 | 0.00000   | 0.00000  | 0.00000 |
| 0.00000 ; | C9-  | N3-  | C8-  | HC82 |          |         |           |          |         |
| 12        | 14   | 15   | 34   | 3    | 0.00000  | 0.00000 | 0.00000   | 0.00000  | 0.00000 |
| 0.00000 ; | C9-  | N3-  | C8-  | HC83 |          |         |           |          |         |
| 13        | 12   | 14   | 15   | 3    | 2.51040  | 0.00000 | -2.51040  | 0.00000  | 0.00000 |
| 0.00000 ; | H9-  | C9-  | N3-  | C8   |          |         |           |          |         |
| 14        | 15   | 16   | 17   | 3    | 1.60247  | 4.80742 | 5.43920   | -6.40989 | 0.00000 |
| 0.00000 ; | N3-  | C8-  | O2-  | C7   |          |         |           |          |         |
| 15        | 16   | 17   | 18   | 3    | 1.60247  | 4.80742 | 5.43920   | -6.40989 | 0.00000 |
| 0.00000 ; | C8-  | O2-  | C7-  | N2   |          |         |           |          |         |
| 15        | 16   | 17   | 35   | 3    | 1.60387  | 4.81160 | 0.00000   | -6.41547 | 0.00000 |
| 0.00000 ; | C8-  | O2-  | C7-  | HC72 |          |         |           |          |         |
| 15        | 16   | 17   | 36   | 3    | 1.60387  | 4.81160 | 0.00000   | -6.41547 | 0.00000 |
| 0.00000 ; | C8-  | O2-  | C7-  | HC73 |          |         |           |          |         |
| 16        | 17   | 18   | 19   | 3    | 0.00000  | 0.00000 | 0.00000   | 0.00000  | 0.00000 |
| 0.00000 ; | O2-  | C7-  | N2-  | C5   |          |         |           |          |         |
| 16        | 17   | 18   | 23   | 3    | 0.00000  | 0.00000 | 0.00000   | 0.00000  | 0.00000 |
| 0.00000 ; | O2-  | C7-  | N2-  | C4   |          |         |           |          |         |

|           |      |     |     |      |          |         |           |          |         |
|-----------|------|-----|-----|------|----------|---------|-----------|----------|---------|
| 17        | 16   | 15  | 33  | 3    | 1.60387  | 4.81160 | 0.00000   | -6.41547 | 0.00000 |
| 0.00000 ; | C7-  | O2- | C8- | HC82 |          |         |           |          |         |
| 17        | 16   | 15  | 34  | 3    | 1.60387  | 4.81160 | 0.00000   | -6.41547 | 0.00000 |
| 0.00000 ; | C7-  | O2- | C8- | HC83 |          |         |           |          |         |
| 17        | 18   | 19  | 20  | 3    | 2.51040  | 0.00000 | -2.51040  | 0.00000  | 0.00000 |
| 0.00000 ; | C7-  | N2- | C5- | H5   |          |         |           |          |         |
| 17        | 18   | 19  | 21  | 3    | 2.51040  | 0.00000 | -2.51040  | 0.00000  | 0.00000 |
| 0.00000 ; | C7-  | N2- | C5- | C6   |          |         |           |          |         |
| 17        | 18   | 23  | 24  | 3    | 2.51040  | 0.00000 | -2.51040  | 0.00000  | 0.00000 |
| 0.00000 ; | C7-  | N2- | C4- | H4   |          |         |           |          |         |
| 17        | 18   | 23  | 25  | 3    | 2.51040  | 0.00000 | -2.51040  | 0.00000  | 0.00000 |
| 0.00000 ; | C7-  | N2- | C4- | C3   |          |         |           |          |         |
| 18        | 19   | 21  | 22  | 3    | 30.33400 | 0.00000 | -30.33400 | 0.00000  | 0.00000 |
| 0.00000 ; | N2-  | C5- | C6- | F1   |          |         |           |          |         |
| 18        | 19   | 21  | 27  | 3    | 30.33400 | 0.00000 | -30.33400 | 0.00000  | 0.00000 |
| 0.00000 ; | N2-  | C5- | C6- | C2   |          |         |           |          |         |
| 18        | 23   | 25  | 26  | 3    | 30.33400 | 0.00000 | -30.33400 | 0.00000  | 0.00000 |
| 0.00000 ; | N2-  | C4- | C3- | H31  |          |         |           |          |         |
| 18        | 23   | 25  | 27  | 3    | 30.33400 | 0.00000 | -30.33400 | 0.00000  | 0.00000 |
| 0.00000 ; | N2-  | C4- | C3- | C2   |          |         |           |          |         |
| 19        | 18   | 17  | 35  | 3    | 0.00000  | 0.00000 | 0.00000   | 0.00000  | 0.00000 |
| 0.00000 ; | C5-  | N2- | C7- | HC72 |          |         |           |          |         |
| 19        | 18   | 17  | 36  | 3    | 0.00000  | 0.00000 | 0.00000   | 0.00000  | 0.00000 |
| 0.00000 ; | C5-  | N2- | C7- | HC73 |          |         |           |          |         |
| 19        | 18   | 23  | 24  | 3    | 2.51040  | 0.00000 | -2.51040  | 0.00000  | 0.00000 |
| 0.00000 ; | C5-  | N2- | C4- | H4   |          |         |           |          |         |
| 19        | 18   | 23  | 25  | 3    | 2.51040  | 0.00000 | -2.51040  | 0.00000  | 0.00000 |
| 0.00000 ; | C5-  | N2- | C4- | C3   |          |         |           |          |         |
| 19        | 21   | 27  | 25  | 3    | 30.33400 | 0.00000 | -30.33400 | 0.00000  | 0.00000 |
| 0.00000 ; | C5-  | C6- | C2- | C3   |          |         |           |          |         |
| 19        | 21   | 27  | 28  | 3    | 30.33400 | 0.00000 | -30.33400 | 0.00000  | 0.00000 |
| 0.00000 ; | C5-  | C6- | C2- | C1   |          |         |           |          |         |
| 20        | 19   | 18  | 23  | 3    | 2.51040  | 0.00000 | -2.51040  | 0.00000  | 0.00000 |
| 0.00000 ; | H5-  | C5- | N2- | C4   |          |         |           |          |         |
| 20        | 19   | 21  | 22  | 3    | 30.33400 | 0.00000 | -30.33400 | 0.00000  | 0.00000 |
| 0.00000 ; | H5-  | C5- | C6- | F1   |          |         |           |          |         |
| 20        | 19   | 21  | 27  | 3    | 30.33400 | 0.00000 | -30.33400 | 0.00000  | 0.00000 |
| 0.00000 ; | H5-  | C5- | C6- | C2   |          |         |           |          |         |
| 21        | 19   | 18  | 23  | 3    | 2.51040  | 0.00000 | -2.51040  | 0.00000  | 0.00000 |
| 0.00000 ; | C6-  | C5- | N2- | C4   |          |         |           |          |         |
| 21        | 27   | 25  | 23  | 3    | 30.33400 | 0.00000 | -30.33400 | 0.00000  | 0.00000 |
| 0.00000 ; | C6-  | C2- | C3- | C4   |          |         |           |          |         |
| 21        | 27   | 25  | 26  | 3    | 30.33400 | 0.00000 | -30.33400 | 0.00000  | 0.00000 |
| 0.00000 ; | C6-  | C2- | C3- | H31  |          |         |           |          |         |
| 21        | 27   | 28  | 29  | 3    | 21.33840 | 0.00000 | -21.33840 | 0.00000  | 0.00000 |
| 0.00000 ; | C6-  | C2- | C1- | N1   |          |         |           |          |         |
| 21        | 27   | 28  | 37  | 3    | 55.64720 | 0.00000 | -55.64720 | 0.00000  | 0.00000 |
| 0.00000 ; | C6-  | C2- | C1- | HC1  |          |         |           |          |         |
| 22        | 21   | 27  | 25  | 3    | 30.33400 | 0.00000 | -30.33400 | 0.00000  | 0.00000 |
| 0.00000 ; | F1-  | C6- | C2- | C3   |          |         |           |          |         |
| 22        | 21   | 27  | 28  | 3    | 30.33400 | 0.00000 | -30.33400 | 0.00000  | 0.00000 |
| 0.00000 ; | F1-  | C6- | C2- | C1   |          |         |           |          |         |
| 23        | 18   | 17  | 35  | 3    | 0.00000  | 0.00000 | 0.00000   | 0.00000  | 0.00000 |
| 0.00000 ; | C4-  | N2- | C7- | HC72 |          |         |           |          |         |
| 23        | 18   | 17  | 36  | 3    | 0.00000  | 0.00000 | 0.00000   | 0.00000  | 0.00000 |
| 0.00000 ; | C4-  | N2- | C7- | HC73 |          |         |           |          |         |
| 23        | 25   | 27  | 28  | 3    | 30.33400 | 0.00000 | -30.33400 | 0.00000  | 0.00000 |
| 0.00000 ; | C4-  | C3- | C2- | C1   |          |         |           |          |         |
| 24        | 23   | 25  | 26  | 3    | 30.33400 | 0.00000 | -30.33400 | 0.00000  | 0.00000 |
| 0.00000 ; | H4-  | C4- | C3- | H31  |          |         |           |          |         |
| 24        | 23   | 25  | 27  | 3    | 30.33400 | 0.00000 | -30.33400 | 0.00000  | 0.00000 |
| 0.00000 ; | H4-  | C4- | C3- | C2   |          |         |           |          |         |
| 25        | 27   | 28  | 29  | 3    | 21.33840 | 0.00000 | -21.33840 | 0.00000  | 0.00000 |
| 0.00000 ; | C3-  | C2- | C1- | N1   |          |         |           |          |         |
| 25        | 27   | 28  | 37  | 3    | 55.64720 | 0.00000 | -55.64720 | 0.00000  | 0.00000 |
| 0.00000 ; | C3-  | C2- | C1- | HC1  |          |         |           |          |         |
| 26        | 25   | 27  | 28  | 3    | 30.33400 | 0.00000 | -30.33400 | 0.00000  | 0.00000 |
| 0.00000 ; | H31- | C3- | C2- | C1   |          |         |           |          |         |
| 27        | 28   | 29  | 30  | 3    | 34.72720 | 0.00000 | -34.72720 | 0.00000  | 0.00000 |
| 0.00000 ; | C2-  | C1- | N1- | O1   |          |         |           |          |         |

```

    28    29    30    31    3    26.77760    0.00000   -26.77760    0.00000    0.00000
0.00000 ;    C1-   N1-   O1-   H15
    30    29    28    37    3    34.72720    0.00000   -34.72720    0.00000    0.00000
0.00000 ;    O1-   N1-   C1-   HC1

```

[ dihedrals ] ; impropers

; treated as propers in GROMACS to use correct AMBER analytical function

```

;   i     j     k     l   func   phase    kd     pn
   5     8     6     7     1   180.00  4.60240  2 ;   C11-   C13-   C12-   F2
   5    12    10    11     1   180.00  4.60240  2 ;   C11-    C9-   C10-   H10
   5    32     4     3     1   180.00  4.60240  2 ;   C11-  HC14-  C14-   N4
   6     9     8    14     1   180.00  4.60240  2 ;   C12-   H13-   C13-   N3
   6    10     5     4     1   180.00  4.60240  2 ;   C12-   C10-   C11-   C14
   8    12    14    15     1   180.00  4.60240  2 ;   C13-    C9-    N3-    C8
  10    13    12    14     1   180.00  4.60240  2 ;   C10-   H9-    C9-    N3
  17    19    18    23     1   180.00  4.60240  2 ;    C7-    C5-    N2-    C4
  19    27    21    22     1   180.00  4.60240  2 ;    C5-    C2-    C6-    F1
  21    20    19    18     1   180.00  4.60240  2 ;    C6-    H5-    C5-    N2
  21    25    27    28     1   180.00  4.60240  2 ;    C6-    C3-    C2-    C1
  23    27    25    26     1   180.00  4.60240  2 ;    C4-    C2-    C3-   H31
  25    24    23    18     1   180.00  4.60240  2 ;    C3-    H4-    C4-    N2
  27    37    28    29     1   180.00  4.60240  2 ;    C2-   HC1-   C1-    N1

```

## 2. Convergence of Well-Tempered Metadynamics Runs

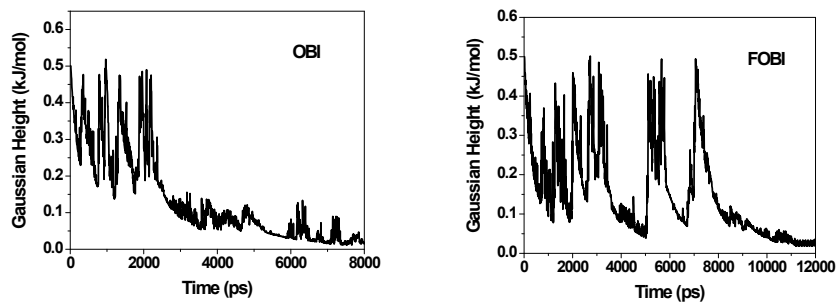

**Fig. S1:** The heights of the Gaussians as a function of number of hills added (at an interval of 5 ps) during the course of well-tempered metadynamics runs for OBI and FOBI in polarizable water. As a signature of the convergence of the well-tempered metadynamics, heights of added Gaussians can be seen to approach a value close to zero and remain there for a long time as the simulation progresses.

### 3. Snapshots of cation- $\pi$ interactions

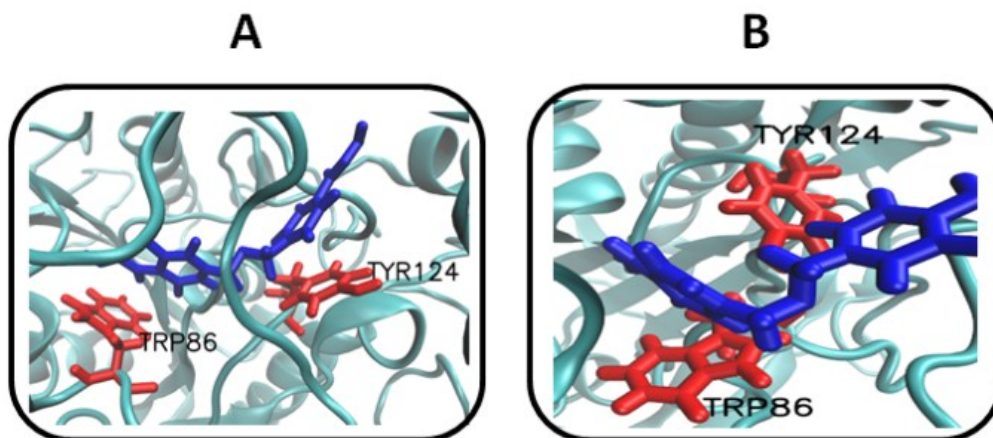

**Fig. S2:** Cation- $\pi$  interactions in a typical bound state of the drug molecules with Trp86 and Tyr124 aromatic residues are shown for (A) fluorinated obidoxime and (B) obidoxime. As it can be seen in this figure, that both the pyridinium rings of FOBI are more in-plane with the aromatic rings of either of these two residues than that in the case of OBI. This also explains the larger cation- $\pi$  interaction parameters for FOBI than that for OBI molecule.

#### 4. Snapshots of the basins and barriers

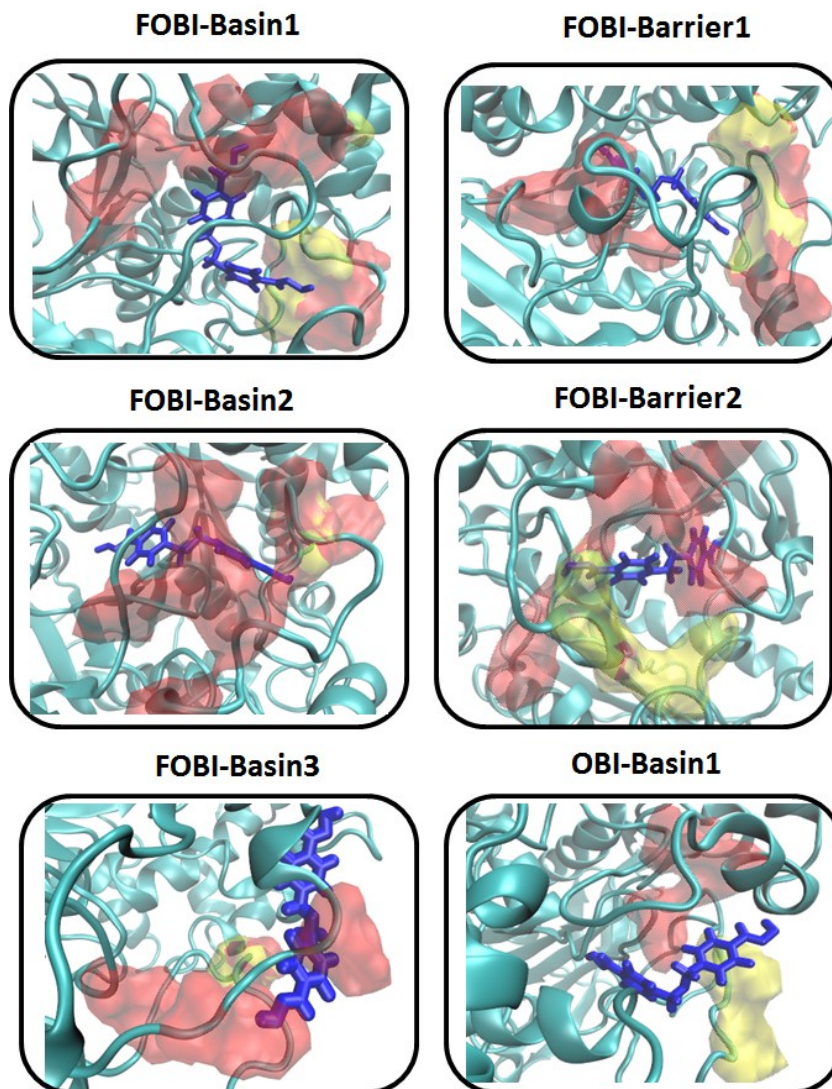

**Fig. S3:** Snapshots of the basins and barriers (marked in Fig. 2, main text) along the unbinding pathway of obidoximes (blue colour) are shown. The hydrogen bond and water bridge forming residues are shown by red and yellow colour surface representations, respectively. The respective residues responsible for these interactions are mentioned in Table 2 and 3 (main text).
